# Supplementary material for: X-ray crystallographic studies of the extracellular domain of the first plant ATP receptor, DORN1, and the orthologous protein from Camelina sativa
Source: PubMed Central journal article supplement (PMC5053164; doi:10.1107/s2053230x16014278), 2016-09-22
Supplement: f-72-00782-sup1.pdf [file f-72-00782-sup1.pdf]

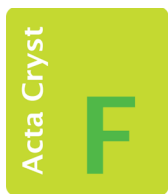

STRUCTURAL BIOLOGY  
COMMUNICATIONS

**Volume 72 (2016)**

**Supporting information for article:**

**X-ray crystallographic studies of the extracellular domain of the first plant ATP receptor, DORN1, and its orthologous protein in *Camelina sativa***

**Zhijie Li, Sayan Chakraborty and Guozhou Xu**

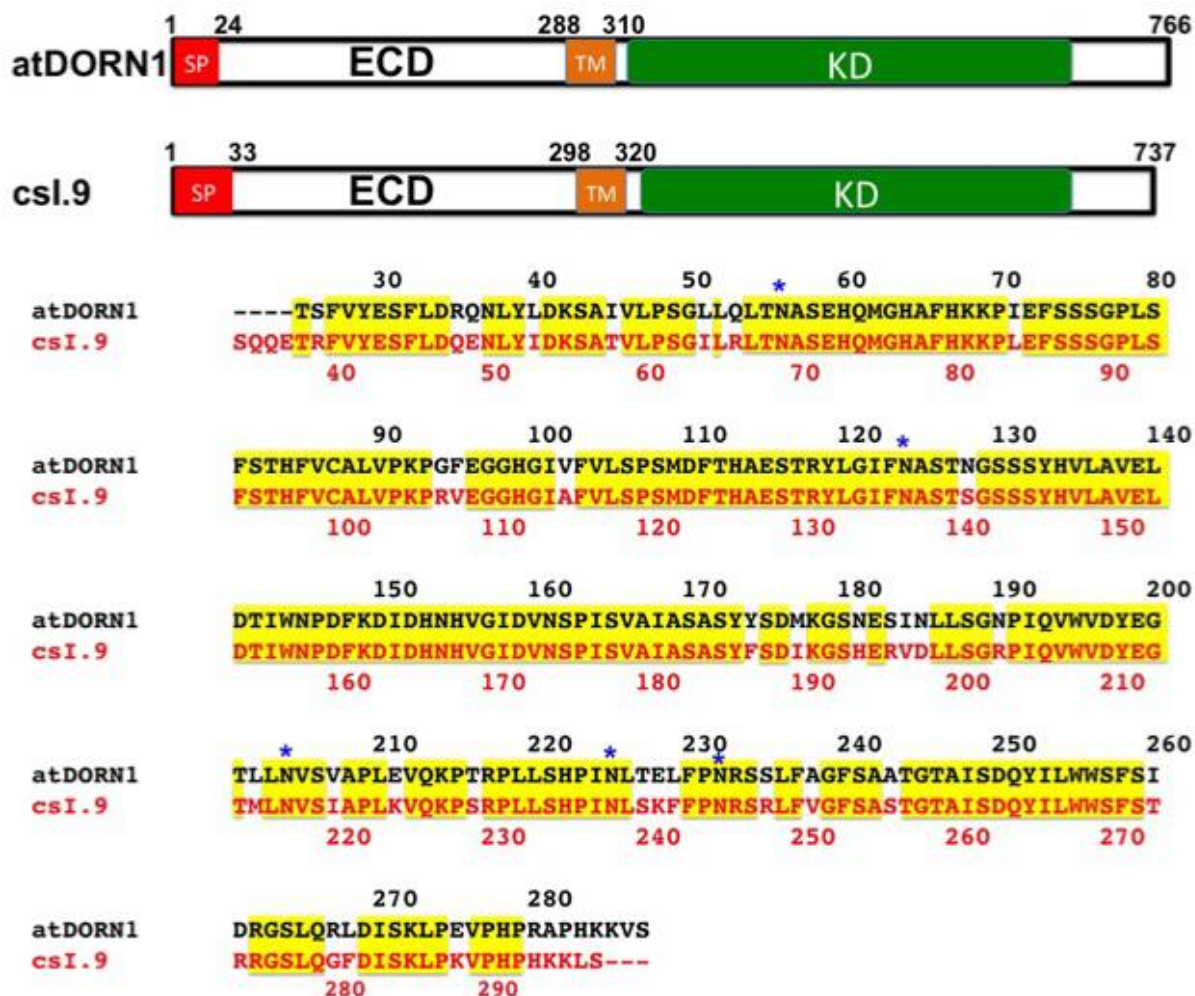

**Figure S1** Domain organizations of the atDORN1 and csI.9 proteins. SP: Signal Peptide. ECD: ExtraCellular Domain. TM: TransMembrane domain. KD: Kinase Domain. The domain boundaries are labeled on the top of each diagram. The sequence alignment between the ECD of atDORN1 (aa 25-287) and csI.9 (aa 34-297) are shown below the diagrams. The overall sequence identity between these two proteins is 90%, while the ECDs of both proteins share 85% sequence identity. The identical residues are contained in yellow boxes, with residue numbers of atDORN1 shown on the top of the sequence, and that of csI-9 below its sequence. The first digit of each number aligns with the indicated residue. The sequence of atDORN1 is colored in black, and that of csI.9 in red.

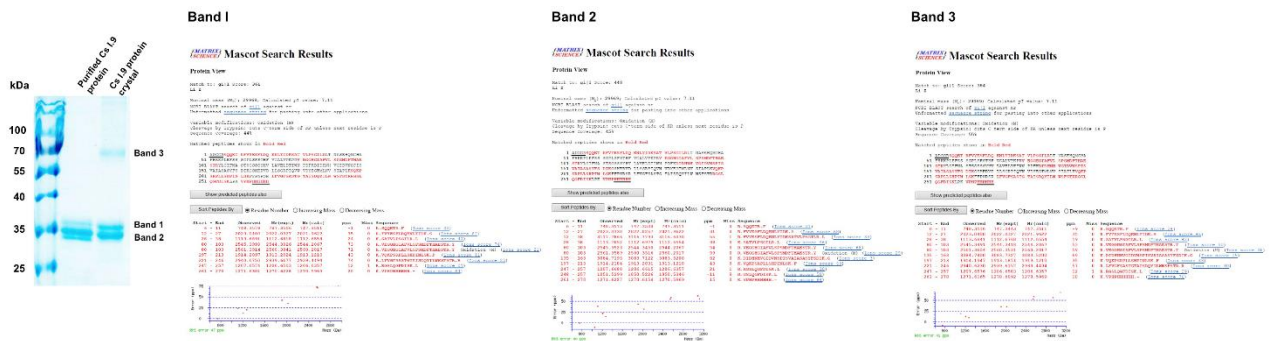

**Figure S2** Mass spectrometry analysis of the csI.9-ECD crystals. The sequences derived from the cloning vector and the engineered C-terminal 6-histidine tags are underlined.

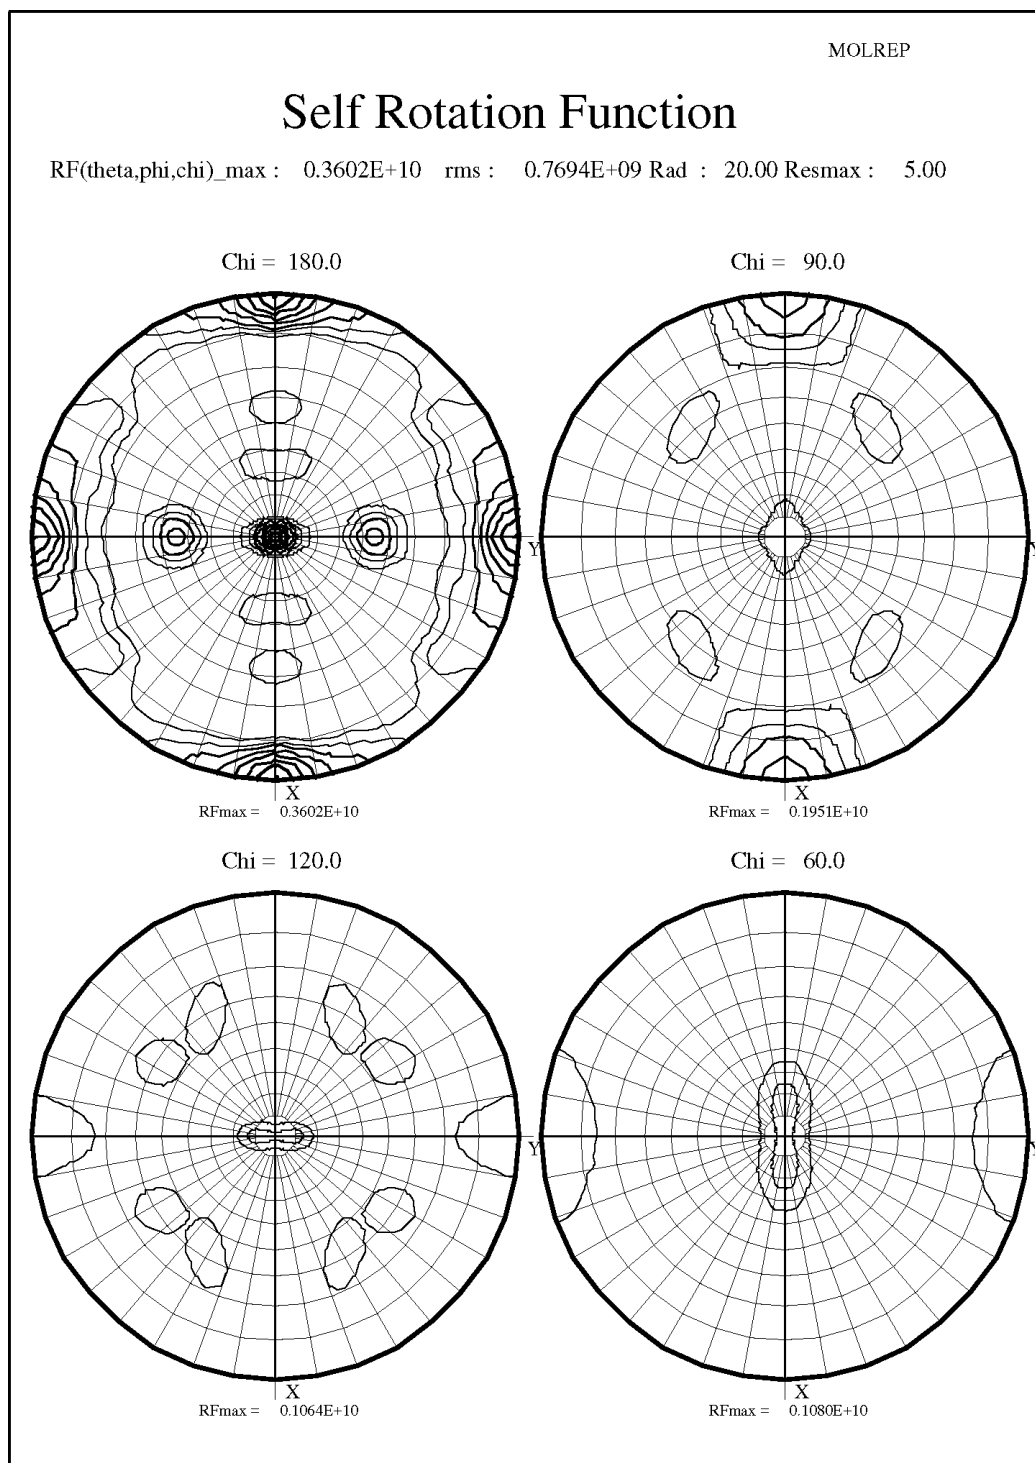

**Figure S3** Self Rotation Function of the csI.9-ECD X-ray diffraction data calculated by MOLREP with the chi angles shown. Since the unit cell is C orthorhombic, the X, Y, Z axes correspond to the crystallographic a, b, c axes respectively. The Z axis is perpendicular to the sections along the center.
